# Supplementary material
Source: PubMed Central journal article supplement (PMC2670866)

# Supplementary figure S7

S7

A

Xenopus EEMREMEEKIVRNFQEYVEPGEEFPASPQRRNTSS-EERDDSIILPLGEDTLTHNLGIPV 229  
Rat EEMKEMEQLIRDFQEYVEPGEDFPASPQRRATAAQEDRDDSIVLPLGADTLTHNLGLPV 240  
Human EEMKQMEQLIRDFQEYVEPGEDFPASPQRRNTASQEDKDDSIVLPLGADTLTHNLGIPV 240

Xenopus FVHEKEIVAEDDQVFLMKQQSQLAKQPPATAGR-QDASPRVPGGSPRTTPSRSGSTNVASV 408  
Rat FVHEKEIMAEDDQVFLMKLQSLAKQPPATAAGRVPDASPRVPGGSPRTTPNRSVSSNVASV 420  
Human FVHEKEIMAEDDQVFLMKLQSLAKQPPATAAGRVPDASPRVPGGSPRTTPNRSVSSNVASV 420

B

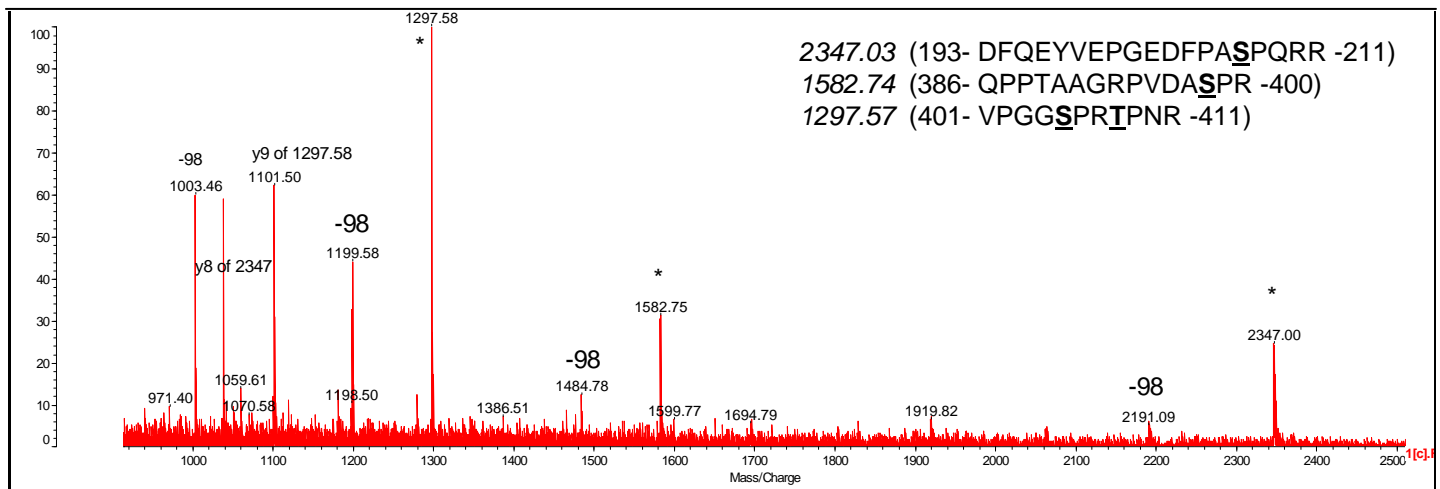

Supplement: emboj200938s11.pdf [file emboj200938s11.pdf]
