# Supplementary material
Source: PubMed Central journal article supplement (PMC2670866)

# Supplementary figure S6

S6

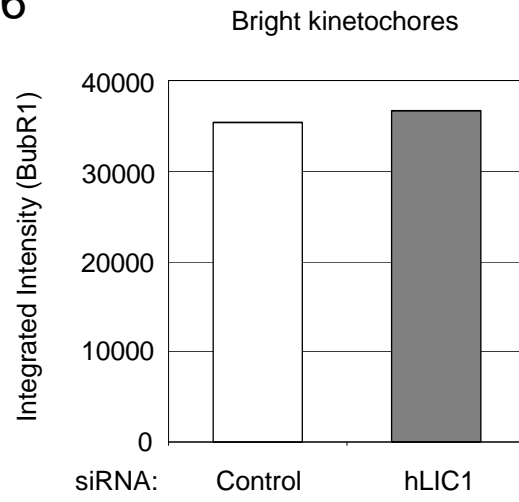

Supplement: emboj200938s10.pdf [file emboj200938s10.pdf]

# Supplementary figure S1

S1

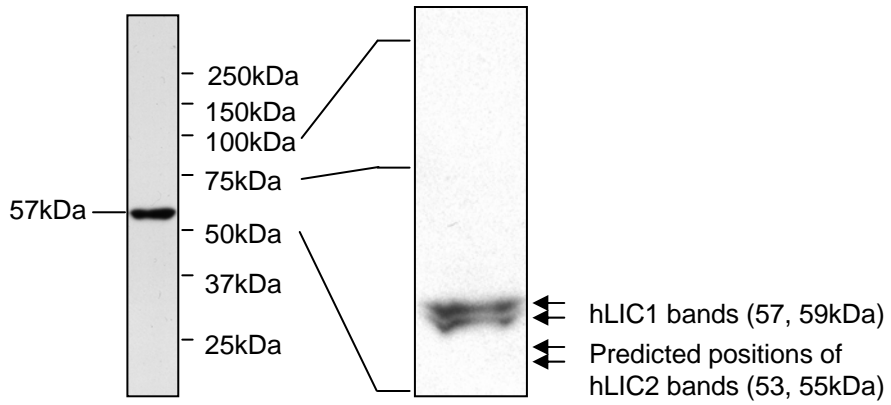

Supplement: emboj200938s5.pdf [file emboj200938s5.pdf]

# Supplementary figure S2

S2

TERT-BJ1

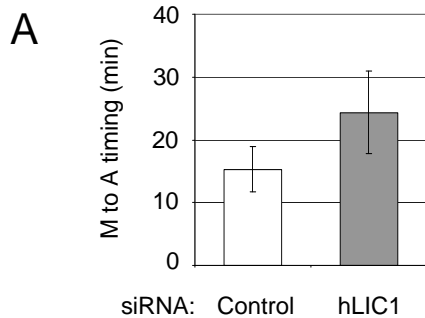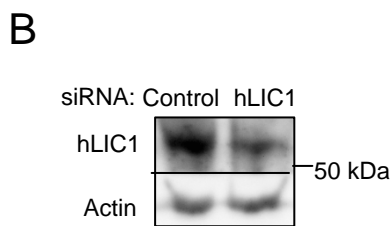

SAOS

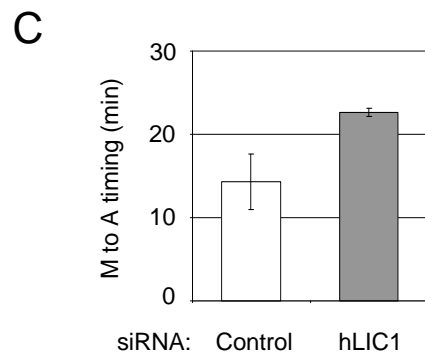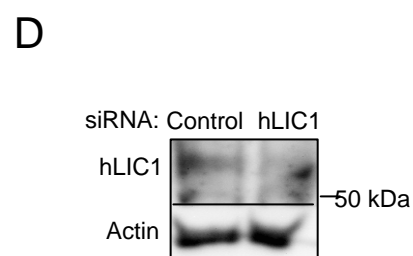

Supplement: emboj200938s6.pdf [file emboj200938s6.pdf]

# Supplementary figure S3

## S3

### A

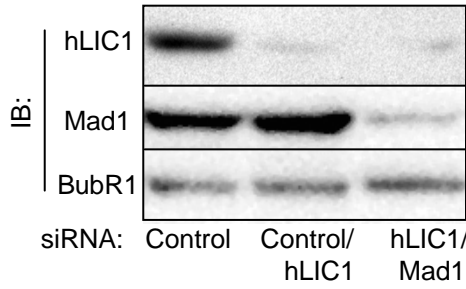

### B

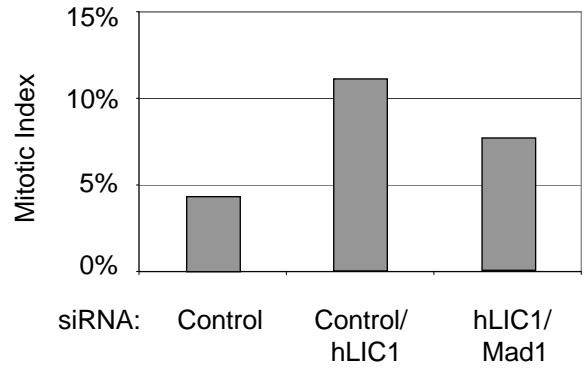

Supplement: emboj200938s7.pdf [file emboj200938s7.pdf]

# Supplementary figure S4

S4

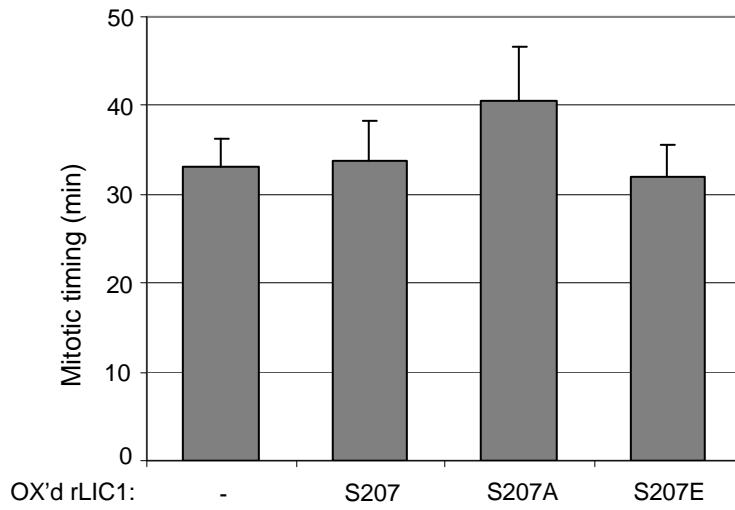

Supplement: emboj200938s8.pdf [file emboj200938s8.pdf]

# Supplementary figure S5

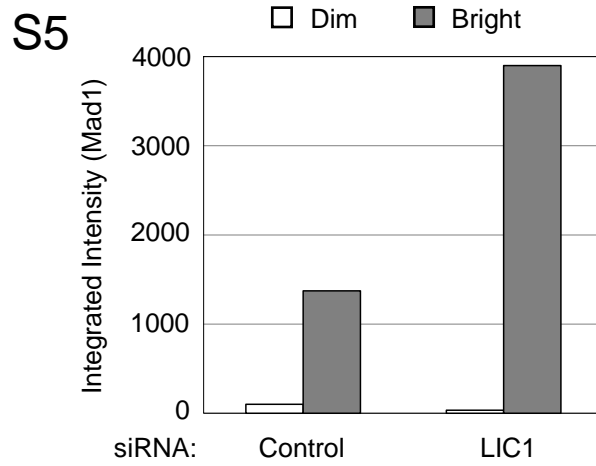

Supplement: emboj200938s9.pdf [file emboj200938s9.pdf]
